# Supplementary material
Source: PubMed Central journal article supplement (PMC3385933)
Supplement: NIHMS370969-supplement-Supplementary_Data.pdf [file NIHMS370969-supplement-Supplementary_Data.pdf]

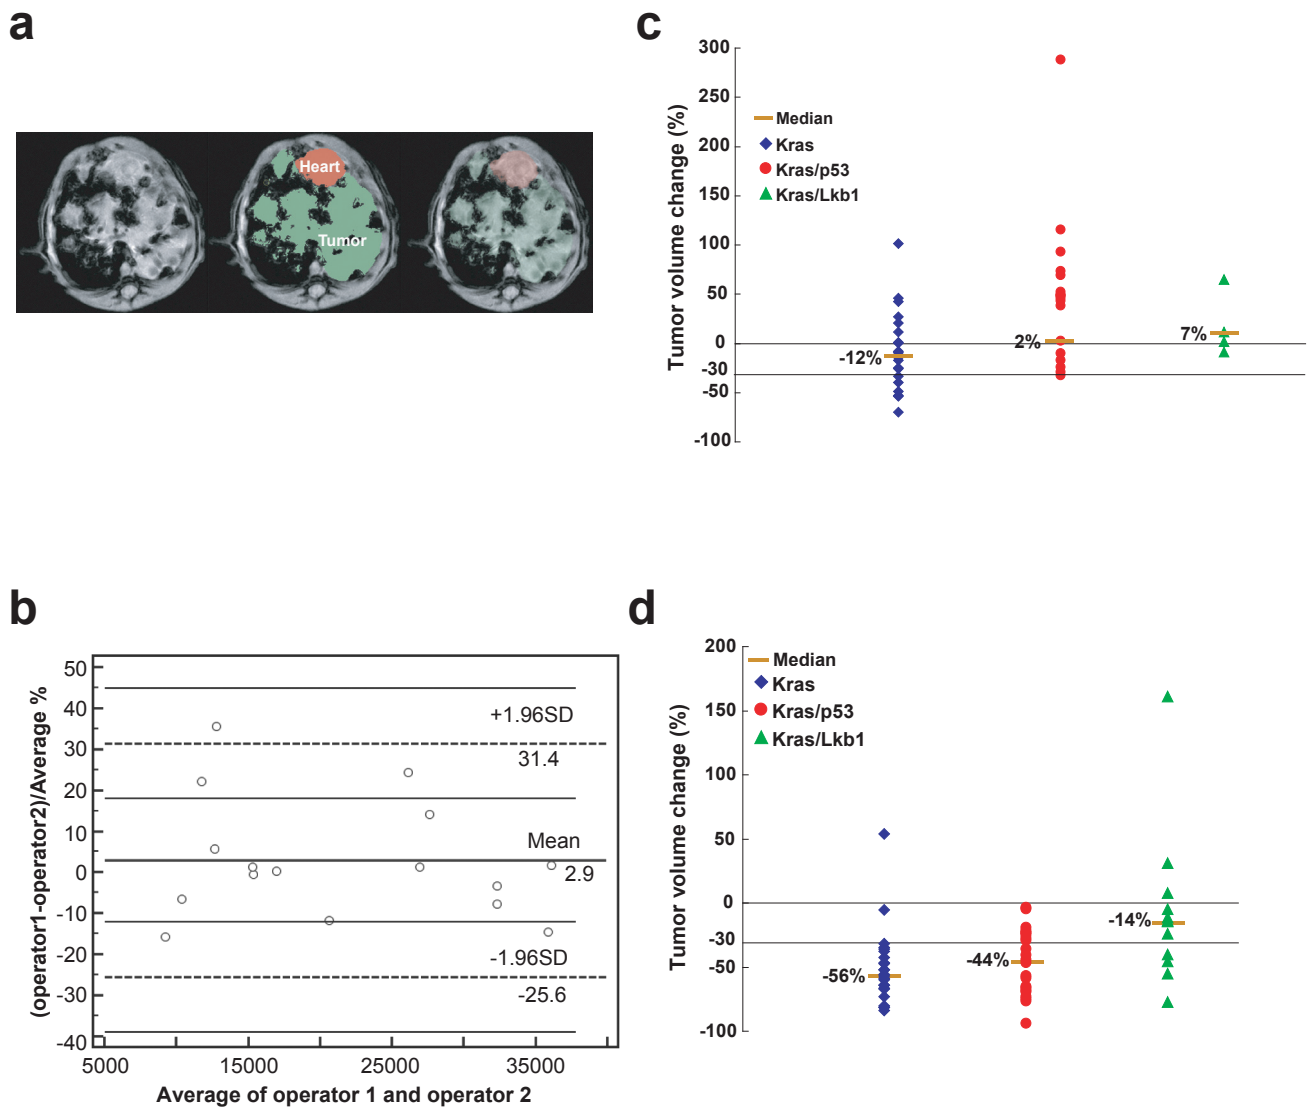

**Supplementary Figure 1.** Quantification of mouse lung cancers

**a**, Volumetric quantification of MRI scans using 3D Slicer software. Left, one axial slice of MRI scan; Middle, segmentation of tumor using thresholding and manual adjustment of regions of interest; green=tumor, red=heart; Right, fused image. **b**, Bland-Altman plot for reproducibility between two independent operators. Horizontal lines are drawn at the mean difference (+2.9%) and the 95% confidence interval for both lower (-25.6%) and upper (+31.4%) limits of agreement. **c**, Distribution of tumor response in different genotypes after 2 weeks of docetaxel treatment. Lines indicate median response value for each genotype. **d**, Distribution of tumor response in different genotypes after docetaxel plus selumetinib treatment. Line indicates median response value for each genotype.

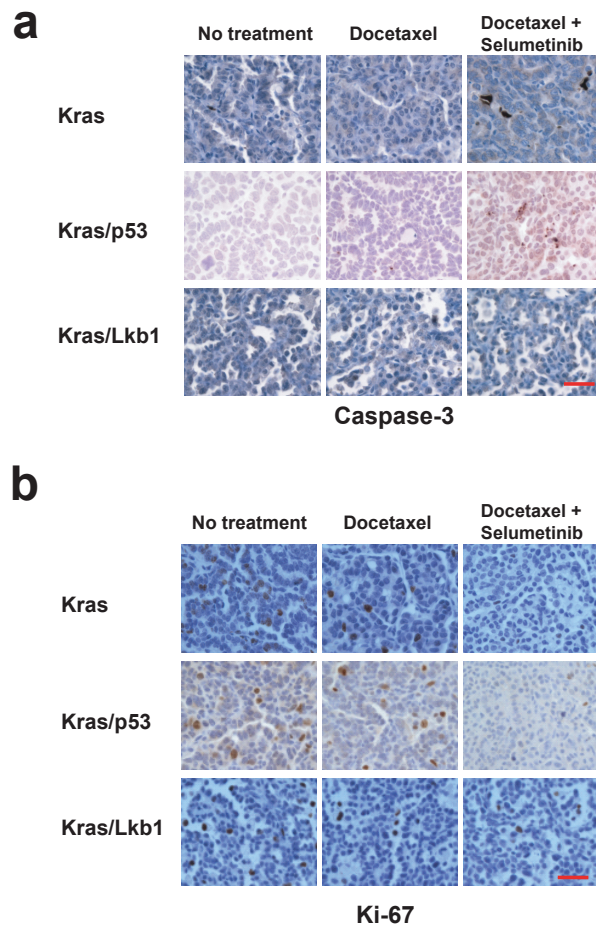

**Supplementary Figure 2.** Docetaxel and selumetinib combination treatment increases activated caspase-3 and reduces Ki-67 staining in the *Kras* and *Kras/p53* mouse tumors compared to docetaxel alone.

**a**, Immunohistochemistry (IHC) staining of activated caspase-3. Scale bar, 50 $\mu$ m. **b**, IHC staining of Ki-67. Scale bar, 50 $\mu$ m.

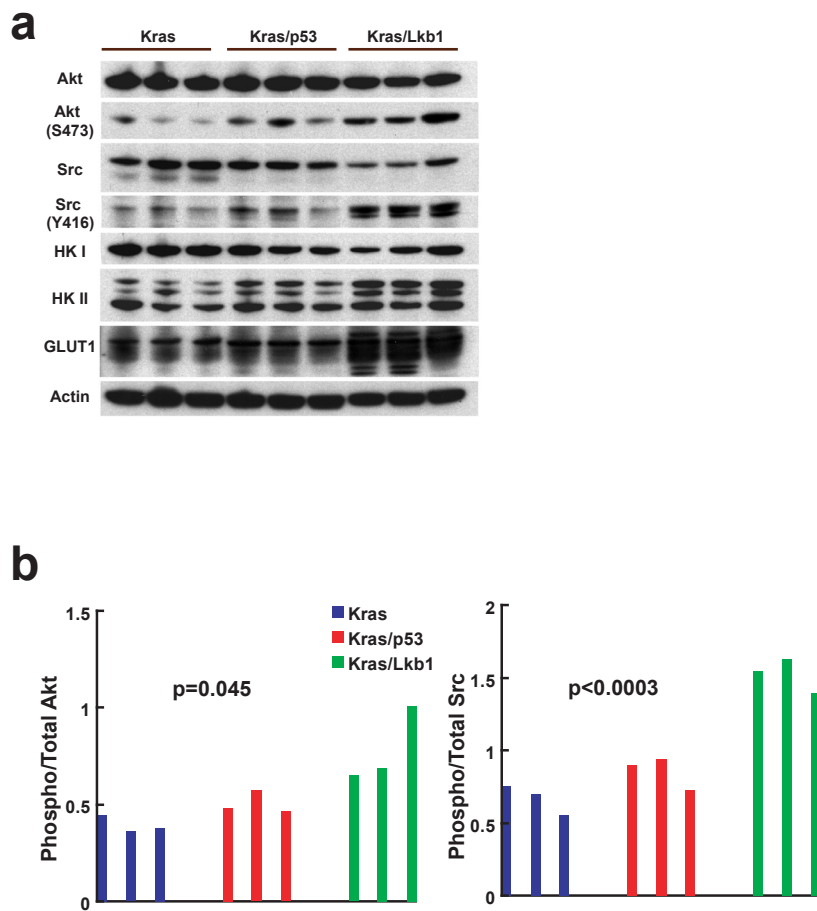

**Supplementary Figure 3.** Signaling pathways active in *Kras/Lkb1* tumors.

**a**, Western blot analysis comparing Akt and Src activity, as well as determinants of glucose metabolism in *Kras*, *Kras/p53*, and *Kras/Lkb1* tumors. **b**, Densitometric quantification of Akt and Src activity shown in panel a, normalized to total Akt or total Src.

**a**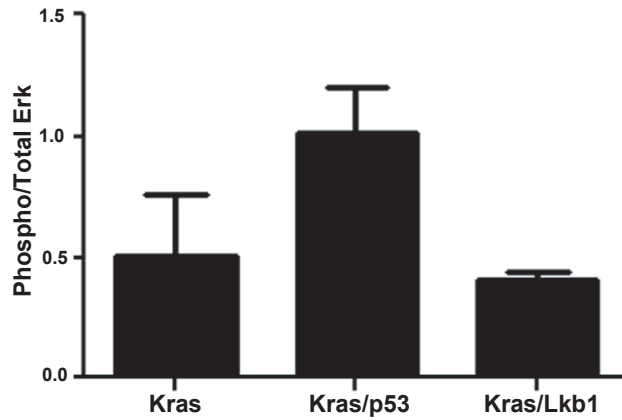**b**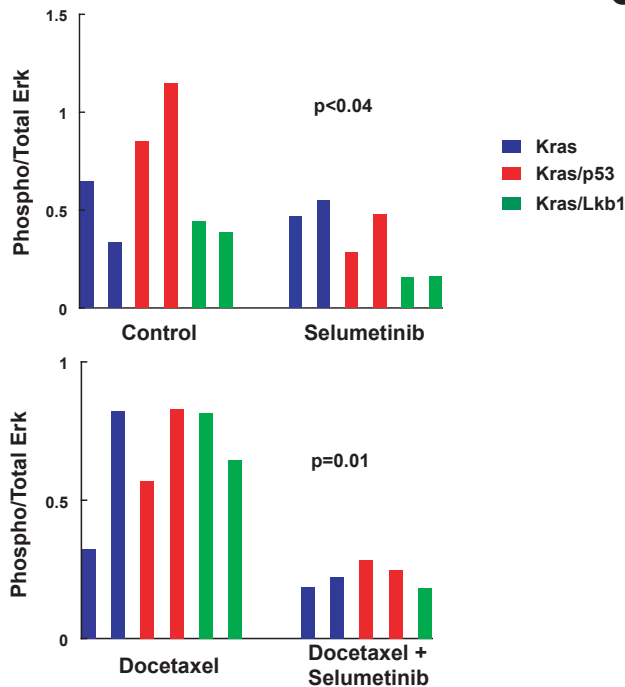**c**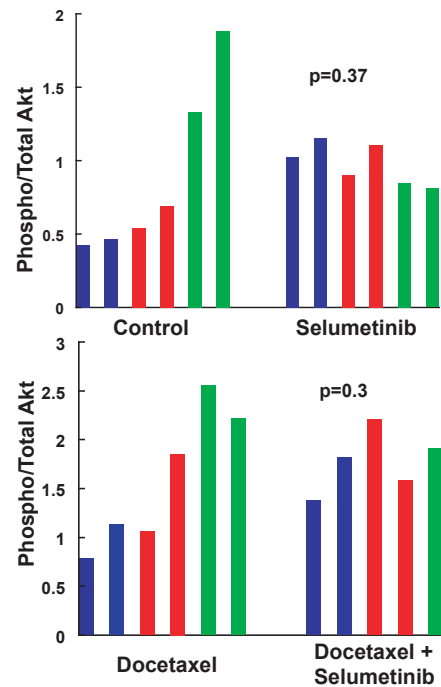

**Supplementary Figure 4.** Quantification of Erk and Akt activity in mouse tumor nodules after treatment. **a**, Densitometric quantification of phospho-Erk levels in untreated *Kras*, *Kras/p53*, and *Kras/Lkb1* mouse tumor nodules (Fig. 3c, n=2 for each genotype), normalized to total Erk (Image J, NCBI) +/- SD. **b**, Quantification of Erk activity for individual samples in Fig. 3c. **c**, Individual quantification of Akt activity for samples in Fig. 3c.

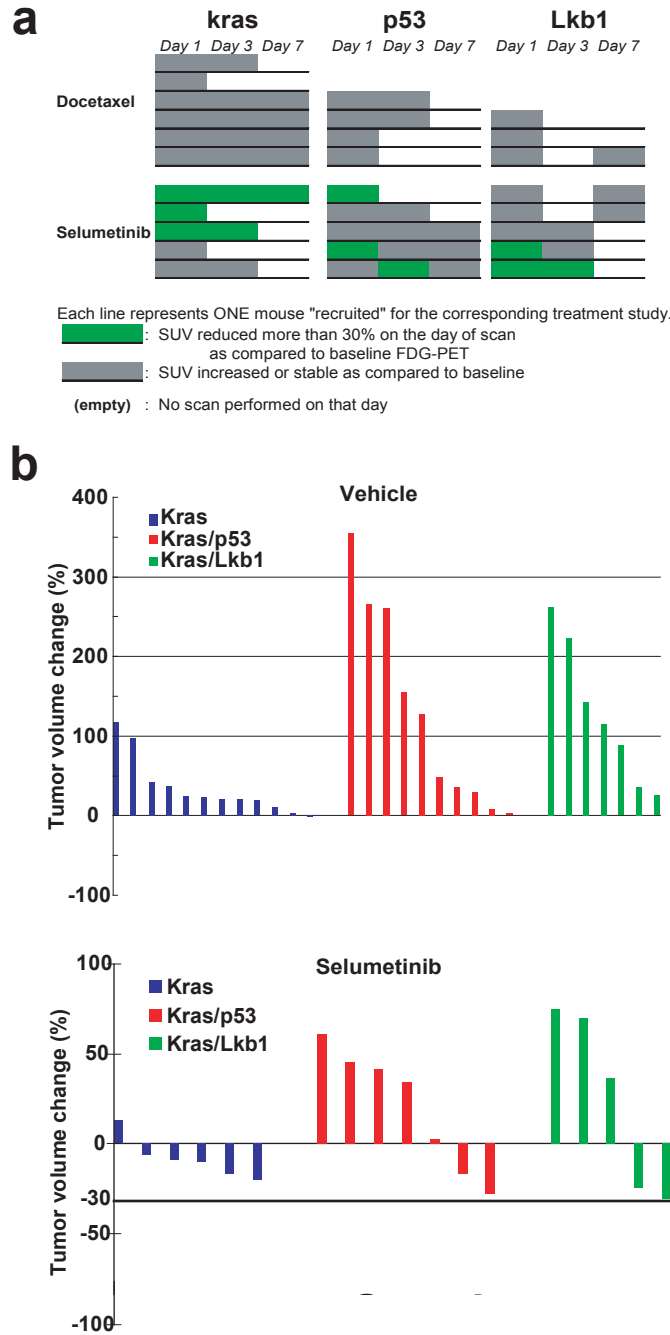

**Supplementary Figure 5.** Selumetinib as a single agent in *Kras*, *Kras/p53* and *Kras/Lkb1* tumor bearing mice. **a**, FDG-PET response for individual mice treated with either docetaxel or selumetinib as single agent. **b**, Top, MRI tumor volume changes in vehicle-treated mice with tumors of the indicated genotypes. Bottom, response of mice to treatment with selumetinib at 25mg/kg daily via oral gavage. Treatment effects were evaluated 2 weeks after baseline MR imaging. Each column represents a single mouse. Partial response threshold (-30%) is shown.

**a**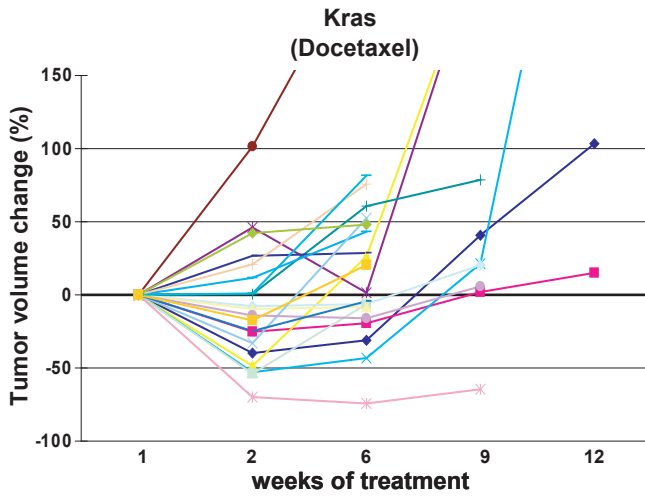**b**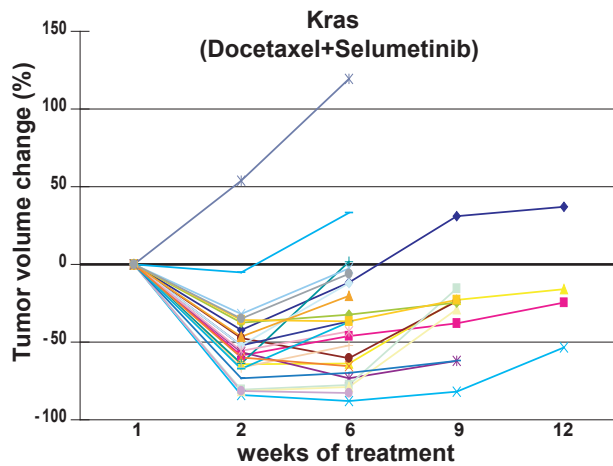**c**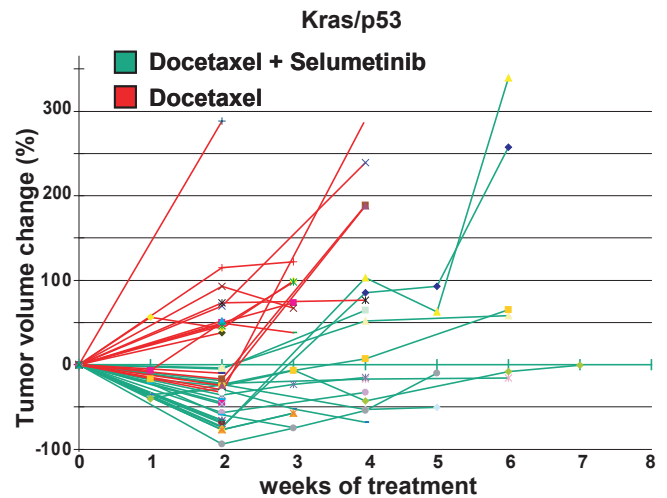

**Supplementary Figure 6.** Longitudinal analysis of tumor volume in response to treatment.

**a**, Tumor volumes were serially determined by MRI in *Kras* mice treated with either docetaxel or **b**, with docetaxel plus selumetinib. **c**, *Kras/p53* mice treated with either docetaxel or docetaxel plus selumetinib. Each line represents an individual mouse. Each data point represents tumor volume change normalized to the baseline tumor volume for each individual mouse.

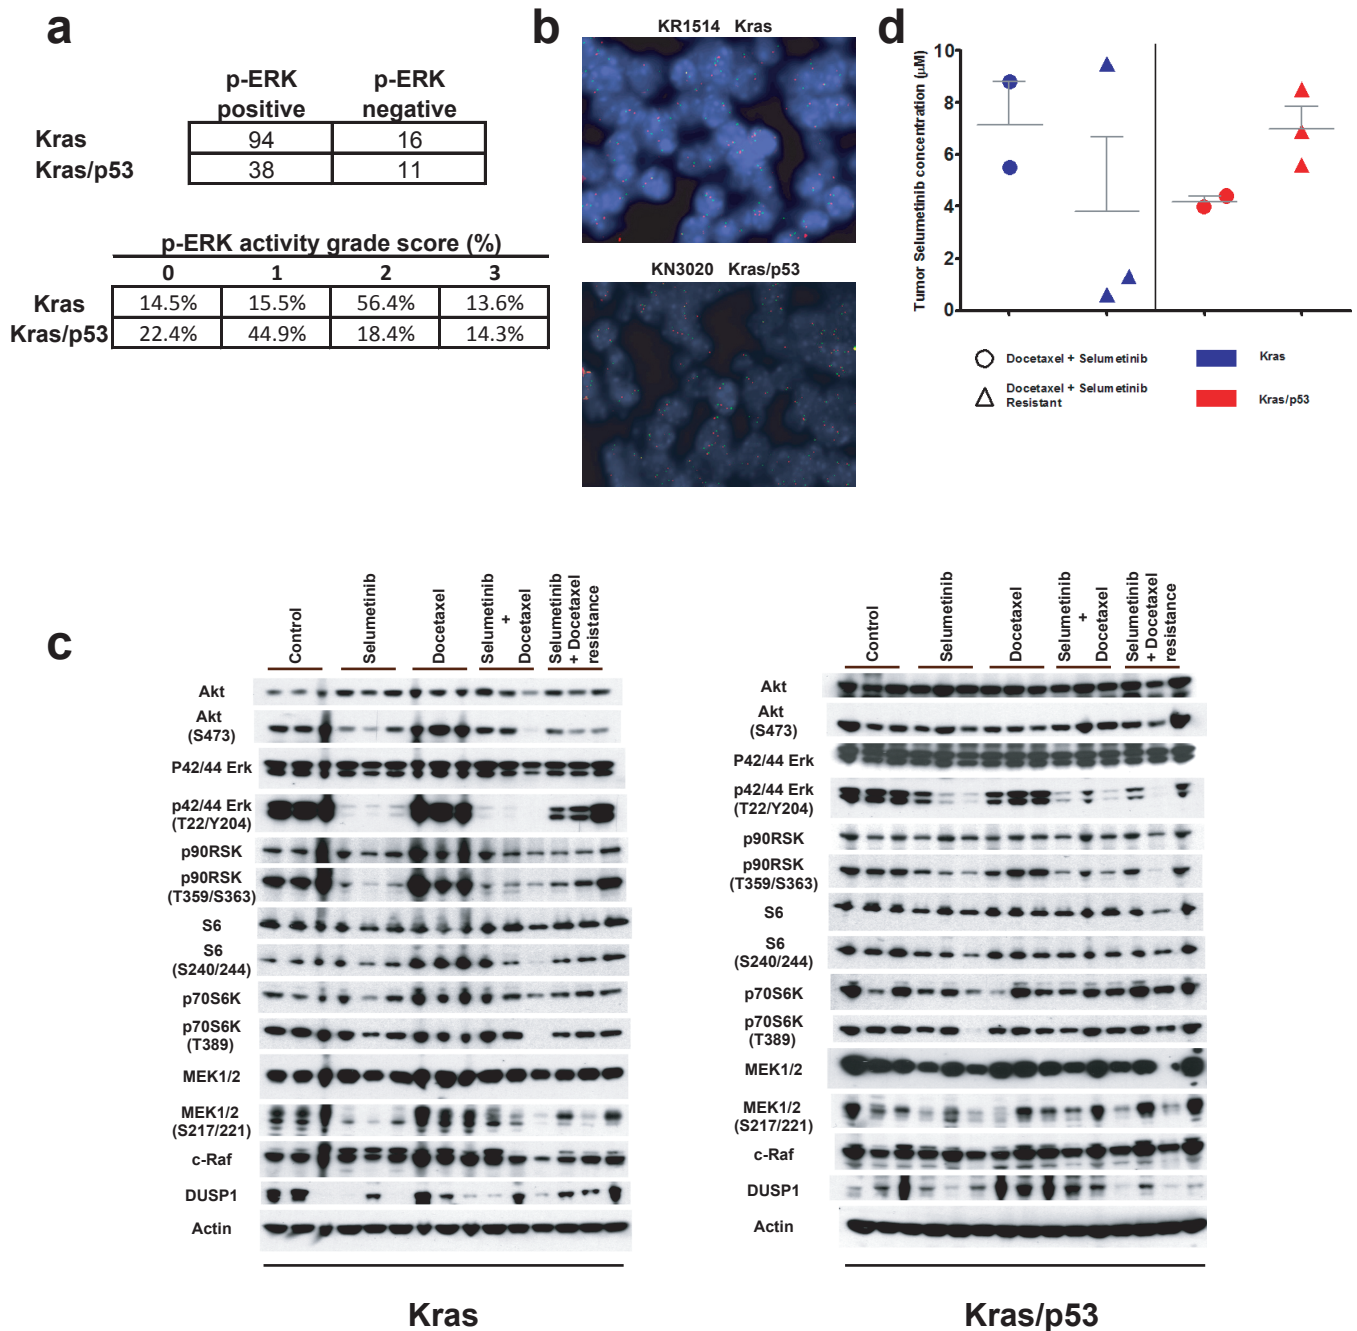

**Supplementary Figure 7.** Study of signaling and mechanisms of acquired resistance in *Kras* and *Kras/p53* tumors treated with docetaxel and selumetinib. **a**, Erk activity in *Kras* and *Kras/p53* tumors with acquire resistance to treatment with docetaxel and selumetinib. Individual nodules were scored for intensity of p-Erk staining. Total numbers of nodules scored (top), and percentage of each intensity grade (bottom) are shown. **b**, FISH staining of Erk genomic locus revealed no amplification in both *Kras* and *Kras/p53* acquired resistant nodules. **c**, Western blotting comparing Erk upstream/downstream (Raf, MEK, p90) and parallel (Akt, p70, S6) pathways. Potential changes in dual specific phosphatase 1 (DUSP1) was also evaluated. **d**, Pharmacokinetics (PK) study of selumetinib concentrations in naive and combination resistant tumor nodules. Nodules were collected from mice with confirmed tumor progression by MRI scans after long-term docetaxel/selumetinib treatment. Mean $\pm$ -SEM are shown.

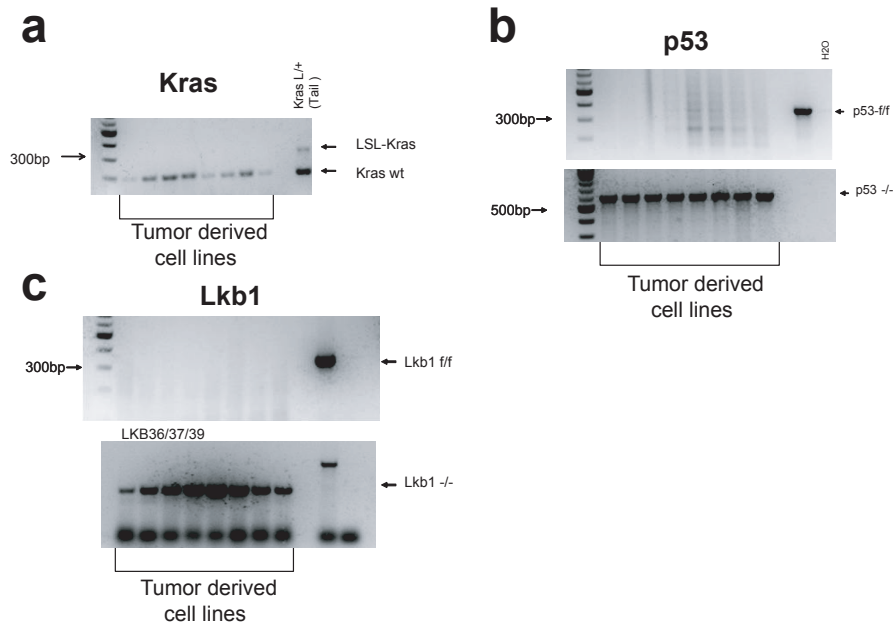

**Supplemental Figure 8.** Confirmation of genotypes in *Kras* tumors with concurrent tumor suppressors loss. *Kras/p53* and *Kras/p53/Lkb1* cell lines were derived from individual tumor nodules after tissue dissection, digestion, and propagation *in vitro* to remove contaminating stromal cells.

**a**, PCR genotyping of activated *Kras* allele. *Lox-stop-lox Kras (LSL-Kras)* allele before and after activation. PCR shows *Kras-LSL* heterozygous tumor derived cell lines lose the *LSL* allele after activation. **b**, PCR genotyping of *p53* deletion. *Lox P*-flanked *p53* allele (*p53<sup>f/f</sup>*) before Cre recombinase mediated deletion. Tumor cell lines all lose the *p53<sup>f/f</sup>* allele, and demonstrate conversion to *p53<sup>-/-</sup>* after CRE recombinase mediated deletion. **c**, PCR genotyping of *Lkb1* deletion. *LoxP*-flanked *Lkb1 (Lkb1<sup>f/f</sup>)* is converted to *Lkb1<sup>-/-</sup>* after Cre recombinase mediated deletion.



Supplementary Table 1

24 hrs ( $\mu\text{M}$ )

|               | <i>Docetaxel/8mpk</i> | <i>Docetaxel/16mpk</i> | <i>Docetaxel/8mpk<br/>+Selumetinib</i> | <i>Docetaxel/16mpk<br/>+Selumetinib</i> |
|---------------|-----------------------|------------------------|----------------------------------------|-----------------------------------------|
| <b>plasma</b> | 43.7                  | 46                     | 18.3                                   | 66.2                                    |
| <b>lung</b>   | 2587                  | 2760.3                 | 1237.8                                 | 5830.1                                  |
| <b>tumor</b>  | 3490.6                | 4493.2                 | N/D                                    | 4555.1                                  |

2 weeks ( $\mu\text{M}$ )

|               | <i>Docetaxel/8mpk</i> | <i>Docetaxel/16mpk</i> | <i>Docetaxel/8mpk<br/>+Selumetinib</i> | <i>Docetaxel/16mpk<br/>+Selumetinib</i> | <i>Docetaxel/16mpk<br/>+Selumetinib</i> |
|---------------|-----------------------|------------------------|----------------------------------------|-----------------------------------------|-----------------------------------------|
| <b>plasma</b> | 100.8                 | 8.9                    | 14.2                                   | 433.2                                   | 96.4                                    |
| <b>lung</b>   | 3057.4                | 1955.7                 | 308.2                                  | 7600.1                                  | 2537.5                                  |
| <b>tumor</b>  | 2426.1                | 2680.6                 | N/D                                    | N/D                                     | 2648.9                                  |

**Supplementary Table 2. Tumor progression in different genotypes**

| Treatment               | Genotype  | number of mice evaluated for tumor burden | number of mice treated | Death before 2wk MRI | tumor progression 2 weeks after treatment | Death before 6wk MRI | Tumor progression 6 weeks after treatment (including death) |
|-------------------------|-----------|-------------------------------------------|------------------------|----------------------|-------------------------------------------|----------------------|-------------------------------------------------------------|
| Docetaxel               | Kras      | 23                                        | 21                     | 1/21                 | 5/20                                      | 1/21                 | 15/20                                                       |
| Selumetinib + Docetaxel | Kras      | 30                                        | 28                     | 3/28                 | 0/25                                      | 3/28                 | 13/25                                                       |
|                         |           |                                           |                        |                      |                                           | Death before 4wk MRI | Tumor progression 4 weeks after treatment (including death) |
| Docetaxel               | Kras/Lkb1 | 10                                        | 9*                     | 5/9                  | 3/4                                       | 7/9                  | 4/4                                                         |
| Selumetinib + Docetaxel | Kras/Lkb1 | 17                                        | 17                     | 5/17                 | 2/12                                      | 15/17                | 12/12                                                       |
| Docetaxel               | Kras/p53  | 22                                        | 20                     | 2/20                 | 12/18                                     | 14/20                | 18/18                                                       |
| Selumetinib + Docetaxel | Kras/p53  | 29                                        | 26                     | 3/26                 | 0/23                                      | 13/26                | 17/23                                                       |

\*Additional 5 mice were evaluated for 2 weeks treatment only, but not included in this table, as they were not followed for long-term changes.

**Supplementary Table 3. Pharmacokinetics of selumetinib in mice**

| Treatment | Genotype | Selumetinib concentration ( $\mu\text{M}$ ) |      |       |
|-----------|----------|---------------------------------------------|------|-------|
|           |          | Serum                                       | Lung | Tumor |
| DS        | Kras     | 12.5                                        | 3.9  | 5.1   |
| DS        | Kras     | N/D                                         | N/D  | 8.8   |
| DS        | Kras/p53 | 17.6                                        | 3.9  | 4.4   |
| DS        | Kras/p53 | 14.1                                        | 1.7  | 4     |
| S         | Kras     | 3.4                                         | 0.9  | 0.7   |
| S         | Kras     | 7.7                                         | 1.9  | 1.5   |
| S         | Kras/p53 | 2.9                                         | 0.6  | 0.6   |
| S         | Kras/p53 | N/D                                         | N/D  | 0.5   |

S=selumetinib

DS=docetaxel + selumetinib

N/D, Not Determined

Tumor bearing mice are treated for 2 weeks.

**Supplementary Table 4. Mice used in treatment study**

| Mouse  | Genotype | Treatment | Sex | DOB        | Adeno-Cre  | Age at Adeno-Cre(weeks) | Treatment Start Date | Induction Length at treatment start(weeks) |
|--------|----------|-----------|-----|------------|------------|-------------------------|----------------------|--------------------------------------------|
| KN3018 | Kras/p53 | DS        | F   | 2010-7-28  | 2010-9-14  | 6.9                     | 2010-11-11           | 8.3                                        |
| KN3019 | Kras/p53 | DS        | F   | 2010-7-28  | 2010-9-14  | 6.9                     | 2010-11-11           | 8.3                                        |
| KN3020 | Kras/p53 | DS        | M   | 2010-7-28  | 2010-9-14  | 6.9                     | 2010-11-11           | 8.3                                        |
| KN2996 | Kras/p53 | DS        | F   | 2010-6-27  | 2010-8-13  | 6.7                     | 2010-11-10           | 12.7                                       |
| KN3021 | Kras/p53 | DS        | F   | 2010-8-17  | 2010-10-1  | 6.4                     | 2010-12-1            | 8.7                                        |
| KN3023 | Kras/p53 | DS        | F   | 2010-8-17  | 2010-10-1  | 6.4                     | 2010-12-1            | 8.7                                        |
| KN3027 | Kras/p53 | DS        | F   | 2010-8-17  | 2010-10-1  | 6.4                     | 2010-12-1            | 8.7                                        |
| KN3049 | Kras/p53 | DS        | F   | 2010-8-15  | 2010-10-1  | 6.7                     | 2010-12-1            | 8.7                                        |
| KN3059 | Kras/p53 | DS        | M   | 2010-8-22  | 2010-10-6  | 6.4                     | 2010-12-8            | 9                                          |
| KN3060 | Kras/p53 | DS        | M   | 2010-8-22  | 2010-10-6  | 6.4                     | 2010-12-8            | 9                                          |
| KN3068 | Kras/p53 | DS        | M   | 2010-8-19  | 2010-10-15 | 8.1                     | 2010-12-15           | 8.7                                        |
| KN3072 | Kras/p53 | DS        | F   | 2010-8-24  | 2010-10-15 | 7.4                     | 2010-12-15           | 8.7                                        |
| KN3075 | Kras/p53 | DS        | M   | 2010-8-24  | 2010-10-15 | 7.4                     | 2010-12-15           | 8.7                                        |
| KN3078 | Kras/p53 | DS        | M   | 2010-8-24  | 2010-10-15 | 7.4                     | 2010-12-15           | 8.7                                        |
| KN3077 | Kras/p53 | DS        | F   | 2010-8-24  | 2010-10-15 | 7.4                     | 2010-12-15           | 8.7                                        |
| KN2535 | Kras/p53 | DS        | F   | 2009-9-10  | 2009-10-30 | 7.1                     | 2009-12-30           | 8.7                                        |
| KN2568 | Kras/p53 | DS        | F   | 2009-9-15  | 2009-10-30 | 6.4                     | 2009-12-30           | 8.7                                        |
| KN2453 | Kras/p53 | DS        | M   | 2009-8-8   | 2009-10-9  | 8.9                     | 2009-12-18           | 10                                         |
| KN2499 | Kras/p53 | DS        | M   | 2009-8-16  | 2009-10-9  | 7.7                     | 2009-12-18           | 10                                         |
| KN2455 | Kras/p53 | DS        | M   | 2009-8-8   | 2009-10-9  | 8.9                     | 2009-12-18           | 10                                         |
| KN2477 | Kras/p53 | DS        | M   | 2009-8-17  | 2009-10-9  | 7.6                     | 2009-12-18           | 10                                         |
| KN2569 | Kras/p53 | DS        | F   | 2009-9-15  | 2009-10-30 | 6.4                     | 2009-12-30           | 8.7                                        |
| KN2539 | Kras/p53 | DS        | F   | 2009-9-10  | 2009-10-30 | 7.1                     | 2009-12-30           | 8.7                                        |
| KN3010 | Kras/p53 | D         | M   | 2010-7-27  | 2010-9-10  | 6.4                     | 2010-11-11           | 8.9                                        |
| KN24   | Kras/p53 | D         | M   | 2010-8-17  | 2010-10-1  | 6.4                     | 2010-12-1            | 8.7                                        |
| KN38   | Kras/p53 | D         | M   | 2010-8-14  | 2010-10-1  | 6.9                     | 2010-12-1            | 8.7                                        |
| KN3050 | Kras/p53 | D         | M   | 2010-8-19  | 2010-10-6  | 6.9                     | 2010-12-8            | 9                                          |
| KN3062 | Kras/p53 | D         | M   | 2010-8-22  | 2010-10-6  | 6.4                     | 2010-12-8            | 9                                          |
| KN3069 | Kras/p53 | D         | F   | 2010-8-24  | 2010-10-15 | 7.4                     | 2010-12-15           | 8.7                                        |
| KN3073 | Kras/p53 | D         | F   | 2010-8-24  | 2010-10-15 | 7.4                     | 2010-12-15           | 8.7                                        |
| KN3051 | Kras/p53 | D         | F   | 2010-8-19  | 2010-10-15 | 8.1                     | 2010-12-15           | 8.7                                        |
| KN3061 | Kras/p53 | D         | F   | 2010-8-22  | 2010-10-15 | 7.7                     | 2010-12-15           | 8.7                                        |
| KN3077 | Kras/p53 | D         | F   | 2010-8-24  | 2010-10-15 | 7.4                     | 2010-12-15           | 8.7                                        |
| KN2419 | Kras/p53 | D         | F   | 2009-7-27  | 2009-9-17  | 7.4                     | 2009-11-27           | 10.1                                       |
| KN2548 | Kras/p53 | D         | F   | 2009-9-8   | 2009-10-30 | 7.4                     | 2009-12-30           | 8.7                                        |
| KN2421 | Kras/p53 | D         | F   | 2009-7-27  | 2009-9-17  | 7.4                     | 2009-11-27           | 10.1                                       |
| KN2537 | Kras/p53 | D         | F   | 2009-9-10  | 2009-10-30 | 7.1                     | 2009-12-30           | 8.7                                        |
| KN2471 | Kras/p53 | D         | F   | 2009-8-17  | 2009-10-9  | 7.6                     | 2009-12-18           | 10                                         |
| KN2550 | Kras/p53 | D         | F   | 2009-9-8   | 2009-10-30 | 7.4                     | 2009-12-30           | 8.7                                        |
| KN2423 | Kras/p53 | D         | F   | 2009-7-23  | 2009-9-17  | 8                       | 2009-11-27           | 10.1                                       |
| KN2474 | Kras/p53 | D         | F   | 2009-8-17  | 2009-10-9  | 7.6                     | 2009-12-18           | 10                                         |
| KN2010 | Kras/p53 | D         | M   | 2009-10-8  | 2009-11-20 | 6.1                     | 2010-1-22            | 9.0                                        |
| KN3118 | Kras/p53 | D         | F   | 2010-9-10  | 2010-11-24 | 10.7                    | 2011-2-1             | 9.9                                        |
| KN2013 | Kras/p53 | D         | M   | 2009-10-16 | 2009-11-20 | 5.0                     | 2010-1-22            | 9.0                                        |
| KN3093 | Kras/p53 | D         | F   | 2010-9-4   | 2010-11-24 | 11.6                    | 2011-2-1             | 9.9                                        |
| KN3129 | Kras/p53 | D         | F   | 2010-9-17  | 2010-11-24 | 9.7                     | 2011-2-1             | 9.9                                        |
| KN3132 | Kras/p53 | D         | F   | 2010-9-17  | 2010-11-24 | 9.7                     | 2011-2-1             | 9.9                                        |
| KN3128 | Kras/p53 | D         | F   | 2010-9-17  | 2010-11-24 | 9.7                     | 2011-2-1             | 9.9                                        |
| KR1531 | Kras     | DS        | F   | 2010-1-13  | 2010-2-24  | 6                       | 2010-5-12            | 11                                         |
| KR1672 | Kras     | DS        | F   | 2010-6-11  | 2010-8-2   | 7.4                     | 2010-12-8            | 18.3                                       |
| KR6204 | Kras     | DS        | F   | 2010-6-28  | 2010-8-11  | 6.3                     | 2010-12-8            | 17                                         |
| KR1519 | Kras     | DS        | F   | 2010-1-13  | 2010-2-24  | 6                       | 2010-5-12            | 11                                         |
| KR1513 | Kras     | DS        | M   | 2010-1-13  | 2010-2-24  | 6                       | 2010-5-12            | 11                                         |
| KR1512 | Kras     | DS        | M   | 2010-1-13  | 2010-2-24  | 6                       | 2010-5-12            | 11                                         |

|          |           |    |   |            |           |     |            |      |
|----------|-----------|----|---|------------|-----------|-----|------------|------|
| KR6085   | Kras      | DS | F | 2010-5-11  | 2010-6-29 | 7   | 2010-10-13 | 15.1 |
| KR1514   | Kras      | DS | F | 2010-1-13  | 2010-2-24 | 6   | 2010-5-29  | 13.4 |
| KR1715   | Kras      | DS | M | 2010-7-2   | 2010-8-17 | 6.6 | 2010-12-1  | 15.1 |
| KR1718   | Kras      | DS | M | 2010-7-2   | 2010-8-17 | 6.6 | 2010-12-1  | 15.1 |
| KL6198   | Kras      | DS | F | 2010-6-27  | 2010-8-11 | 6.4 | 2010-12-8  | 17   |
| KL3915   | Kras      | DS | F | 2009-11-23 | 2010-1-6  | 6.3 | 2010-4-22  | 15.1 |
| KR1713   | Kras      | DS | M | 2010-7-2   | 2010-8-17 | 6.6 | 2010-12-1  | 15.1 |
| KL6093   | Kras      | DS | F | 2010-5-11  | 2010-6-29 | 7   | 2010-10-13 | 15.1 |
| KR1515   | Kras      | DS | F | 2010-1-13  | 2010-2-24 | 6   | 2010-5-29  | 13.4 |
| KR1716   | Kras      | DS | M | 2010-7-2   | 2010-8-17 | 6.6 | 2010-12-1  | 15.1 |
| KL6099   | Kras      | DS | F | 2010-5-18  | 2010-7-6  | 7   | 2010-10-13 | 14.1 |
| KR1503   | Kras      | DS | F | 2010-1-10  | 2010-2-24 | 6.4 | 2010-5-29  | 13.4 |
| KR1510   | Kras      | DS | M | 2010-1-10  | 2010-2-24 | 6.4 | 2010-5-29  | 13.4 |
| KR1509   | Kras      | DS | F | 2010-1-10  | 2010-2-24 | 6.4 | 2010-5-29  | 13.4 |
| KR6199   | Kras      | DS | F | 2010-6-27  | 2010-8-11 | 6.4 | 2010-12-8  | 17   |
| KR6200   | Kras      | DS | F | 2010-6-27  | 2010-8-11 | 6.4 | 2010-12-8  | 17   |
| KL3928   | Kras      | DS | M | 2009-11-23 | 2010-1-6  | 6.3 | 2010-4-22  | 15.1 |
| Kr1645   | Kras      | DS | F | 2010-5-18  | 2010-7-19 | 8.9 | 2010-10-20 | 13.3 |
| kr1678   | Kras      | D  | M | 2010-6-11  | 2010-8-2  | 7.4 | 2010-11-11 | 14.4 |
| Kr1656   | Kras      | D  | M | 2010-5-25  | 2010-7-19 | 7.9 | 2010-10-20 | 13.3 |
| KR1539   | Kras      | D  | F | 2010-1-13  | 2010-2-24 | 6   | 2010-5-12  | 11   |
| KR1712   | Kras      | D  | M | 2010-7-2   | 2010-8-17 | 6.6 | 2010-12-1  | 15.1 |
| KR1511   | Kras      | D  | M | 2010-1-10  | 2010-2-24 | 6.4 | 2010-5-29  | 13.4 |
| KR1685   | Kras      | D  | F | 2010-6-11  | 2010-8-2  | 7.4 | 2010-12-8  | 18.3 |
| KR1530   | Kras      | D  | F | 2010-1-13  | 2010-2-24 | 6   | 2010-5-12  | 11   |
| kr1679   | Kras      | D  | M | 2010-6-11  | 2010-8-2  | 7.4 | 2010-11-11 | 14.4 |
| KR1714   | Kras      | D  | M | 2010-7-2   | 2010-8-17 | 6.6 | 2010-12-1  | 15.1 |
| KR1502   | Kras      | D  | M | 2010-1-10  | 2010-2-24 | 6.4 | 2010-5-29  | 13.4 |
| KR1508   | Kras      | D  | M | 2010-1-10  | 2010-2-24 | 6.4 | 2010-5-29  | 13.4 |
| kr1542   | Kras      | D  | F | 2010-1-13  | 2010-2-24 | 6   | 2010-5-12  | 11   |
| KR1517   | Kras      | D  | M | 2010-1-13  | 2010-2-24 | 6   | 2010-5-12  | 11   |
| KL6103   | Kras      | D  | F | 2010-5-18  | 2010-7-6  | 7   | 2010-10-13 | 14.1 |
| KR1504   | Kras      | D  | M | 2010-1-10  | 2010-2-24 | 6.4 | 2010-5-29  | 13.4 |
| KL6102   | Kras      | D  | F | 2010-5-18  | 2010-7-6  | 7   | 2010-10-13 | 14.1 |
| Kr1642   | Kras      | D  | F | 2010-5-18  | 2010-7-19 | 8.9 | 2010-10-20 | 13.3 |
| Kr1644   | Kras      | D  | M | 2010-5-18  | 2010-7-19 | 8.9 | 2010-10-20 | 13.3 |
| KL3920   | Kras      | D  | M | 2009-11-23 | 2010-1-6  | 6.3 | 2010-4-22  | 15.1 |
| KR1507   | Kras      | D  | M | 2010-1-10  | 2010-2-24 | 6.4 | 2010-5-29  | 13.4 |
| KBc89_27 | Kras      | S  | M | 2011-5-5   | 2011-7-1  | 8.1 | 2011-10-14 | 15.0 |
| KBc89_28 | Kras      | S  | M | 2011-5-5   | 2011-7-1  | 8.1 | 2011-10-14 | 15.0 |
| KBc92_39 | Kras      | S  | F | 2011-5-29  | 2011-7-12 | 6.3 | 2011-10-14 | 13.4 |
| KBc93_44 | Kras      | S  | M | 2011-5-29  | 2011-7-12 | 6.3 | 2011-10-14 | 13.4 |
| KBc93_45 | Kras      | S  | M | 2011-5-29  | 2011-7-12 | 6.3 | 2011-10-14 | 13.4 |
| KBc95_51 | Kras      | S  | M | 2011-5-30  | 2011-7-12 | 6.1 | 2011-10-14 | 13.4 |
| KL405    | Kras/Lkb1 | DS | M | 2010-5-29  | 2010-7-19 | 7.3 | 2010-9-3   | 6.6  |
| KL407    | Kras/Lkb1 | DS | M | 2010-5-29  | 2010-7-19 | 7.3 | 2010-9-3   | 6.6  |
| KL409    | Kras/Lkb1 | DS | M | 2010-5-29  | 2010-7-19 | 7.3 | 2010-9-3   | 6.6  |
| KL6091   | Kras/Lkb1 | DS | F | 2010-6-2   | 2010-7-19 | 6.7 | 2010-9-3   | 6.6  |
| KL6165   | Kras/Lkb1 | DS | F | 2010-6-9   | 2010-7-26 | 6.7 | 2010-10-5  | 10.1 |
| KL6219   | Kras/Lkb1 | DS | M | 2010-7-17  | 2010-8-30 | 6.3 | 2010-10-20 | 7.3  |
| KL6220   | Kras/Lkb1 | DS | F | 2010-7-17  | 2010-8-30 | 6.3 | 2010-10-20 | 7.3  |
| KL6222   | Kras/Lkb1 | DS | F | 2010-7-17  | 2010-8-30 | 6.3 | 2010-10-20 | 7.3  |
| KL6224   | Kras/Lkb1 | DS | M | 2010-7-17  | 2010-8-30 | 6.3 | 2010-10-20 | 7.3  |
| KL6225   | Kras/Lkb1 | DS | M | 2010-7-17  | 2010-8-30 | 6.3 | 2010-10-20 | 7.3  |
| KL6271   | Kras/Lkb1 | DS | F | 2010-8-15  | 2010-9-29 | 6.4 | 2010-11-17 | 7    |
| KL6274   | Kras/Lkb1 | DS | F | 2010-8-15  | 2010-9-29 | 6.4 | 2010-11-17 | 7    |
| KLM28-03 | Kras/Lkb1 | D  | F | 2010-7-3   | 2010-8-23 | 7.3 | 2010-10-20 | 8.3  |

|           |           |   |   |           |           |     |            |      |
|-----------|-----------|---|---|-----------|-----------|-----|------------|------|
| KLM28-05  | Kras/Lkb1 | D | F | 2010-7-3  | 2010-8-23 | 7.3 | 2010-10-20 | 8.3  |
| KLM28-06  | Kras/Lkb1 | D | F | 2010-7-3  | 2010-8-23 | 7.3 | 2010-10-20 | 8.3  |
| KL6270    | Kras/Lkb1 | D | F | 2010-8-15 | 2010-9-29 | 6.4 | 2010-11-17 | 7    |
| KR6706    | Kras/Lkb1 | D | M | 2011-5-20 | 2011-7-8  | 7.0 | 2011-10-12 | 13.7 |
| KR6707    | Kras/Lkb1 | D | M | 2011-5-20 | 2011-7-8  | 7.0 | 2011-10-12 | 13.7 |
| KR6809    | Kras/Lkb1 | D | F | 2011-6-15 | 2011-8-12 | 8.3 | 2011-10-19 | 9.7  |
| KR6932    | Kras/Lkb1 | D | M | 2011-8-12 | 2011-9-15 | 4.9 | 2011-10-19 | 4.9  |
| KBC-81 #0 | Kras/Lkb1 | D | F | 2011-4-16 | 2011-5-22 | 5.1 | 2011-7-12  | 7.3  |
| KR6703    | Kras/Lkb1 | S | M | 2011-5-20 | 2011-7-8  | 7.0 | 2011-10-12 | 13.7 |
| KR6704    | Kras/Lkb1 | S | M | 2011-5-20 | 2011-7-8  | 7.0 | 2011-10-12 | 13.7 |
| KR6817    | Kras/Lkb1 | S | F | 2011-6-18 | 2011-8-12 | 7.9 | 2011-10-12 | 8.7  |
| KR6929    | Kras/Lkb1 | S | M | 2011-8-12 | 2011-9-15 | 4.9 | 2011-10-19 | 4.9  |
| KR6931    | Kras/Lkb1 | S | M | 2011-8-12 | 2011-9-15 | 4.9 | 2011-10-19 | 4.9  |

Legends: D, docetaxel; S, selumetinib; DS: docetaxel + Selumetinib; M, male; F, female.

Supplementary Table 5. Mice used in PET-CT study.

| Label             | Mouse ID | Genotype  | Imaging Date | Treatment    | Days R.X. | SUV_max | % Change   | Liver SUV mean | Liver SUV STD |
|-------------------|----------|-----------|--------------|--------------|-----------|---------|------------|----------------|---------------|
| KBC53             |          | 6 kras    | 2011-3-28    | (Baseline)   | 0         |         | (Baseline) |                |               |
| KBC52             |          | 11 kras   | 2011-3-24    | (Baseline)   | 0         |         | (Baseline) |                |               |
| KBC34#37 (D1)     |          | 37 lkb    | 2010-11-17   | Taxotere     | 0         | 1.2     | (Baseline) | 0.29           | 0.03          |
| KBC34#37 (D1)     |          | 37 lkb    | 2010-11-18   | Taxotere     | 1         | 0.9     | -25%       | 0.25           | 0.025         |
| KBC34#38 (D1)     |          | 38 lkb    | 2010-11-17   | Taxotere+AZD | 0         | 2.5     | (Baseline) | 0.32           | 0.0545        |
| KBC34#38 (D1)     |          | 38 lkb    | 2010-11-18   | Taxotere+AZD | 1         | 3.4     | 36%        | 0.316          | 0.023         |
| KBC41#60 (D1)     |          | 60 lkb    | 2010-12-20   | AZD          | 0         | 3.4     | (Baseline) | 0.445          | 0.47          |
| KBC41#60 (D1)     |          | 60 lkb    | 2010-12-22   | AZD          | 1         | 3.4     | 0%         | 0.43           | 0.042         |
| KBC41#60 (D1)     |          | 60 lkb    | 2010-12-28   | AZD          | 7         | 1.6     | ?          | 0.2            | 0.022         |
| KBC42#62 (D1, D)  |          | 62 lkb    | 2010-12-20   | AZD          | 0         | 1.9     | (Baseline) | 0.5            | 0.028         |
| KBC42#62 (D1, D)  |          | 62 lkb    | 2010-12-22   | AZD          | 1         | 1.9     | 0%         | 0.4            | 0.03          |
| KBC42#62 (D1, D)  |          | 62 lkb    | 2010-12-28   | AZD          | 7         | 2.9     | 53%        | 0.4            | 0.028         |
| KBC43#68 (D1)     |          | 68 lkb    | 2010-12-20   | Taxotere     | 0         | 3.5     | (Baseline) | 0.7            | 0.08          |
| KBC43#68 (D1)     |          | 68 lkb    | 2010-12-22   | Taxotere     | 1         | 3.1     | -11%       | 0.66           | 0.055         |
| KBC43#68 (D1)     |          | 68 lkb    | 2010-12-28   | Taxotere     | 7         | (n/a)   | (n/a)      | (n/a)          | (n/a)         |
| KBC43#71 (D1, D)  |          | 71 lkb    | 2010-12-20   | Taxotere     | 0         | 0.9     | (Baseline) | 0.56           | 0.027         |
| KBC43#71 (D1, D)  |          | 71 lkb    | 2010-12-22   | Taxotere     | 1         | 1.1     | 22%        | 0.65           | 0.07          |
| KBC43#71 (D1, D)  |          | 71 lkb    | 2010-12-28   | Taxotere     | 7         | 7.3     |            | 0.88           | 0.037         |
| KBC42#73 (D1, D)  |          | 73 lkb    | 2010-12-20   | Taxotere+AZD | 0         | 0.5     | (Baseline) | 0.31           | 0.028         |
| KBC42#73 (D1, D)  |          | 73 lkb    | 2010-12-22   | Taxotere+AZD | 1         | 0.56    | 0%         | 0.4            | 0.02          |
| KBC42#73 (D1, D)  |          | 73 lkb    | 2010-12-28   | Taxotere+AZD | 7         | 0.5     | 0%         | 0.35           | 0.01          |
| KBC42#74 (D1, D)  |          | 74 lkb    | 2010-12-20   | Taxotere+AZD | 0         | 2.4     | (Baseline) | 0.54           | 0.024         |
| KBC42#74 (D1, D)  |          | 74 lkb    | 2010-12-22   | Taxotere+AZD | 1         | 2.3     | -4%        | 0.52           | 0.0255        |
| KBC42#74 (D1, D)  |          | 74 lkb    | 2010-12-28   | Taxotere+AZD | 7         | 1.6     | -33%       | 0.45           | 0.028         |
| KBC46#88 (D1, D)  |          | 88 kras   | 2011-3-15    | Taxotere+AZD | 0         | 1.5     | (Baseline) | 0.34           | 0.03          |
| KBC46#88 (D1, D)  |          | 88 kras   | 2011-3-16    | Taxotere+AZD | 1         | 0.9     | -40%       | 0.24           | 0.028         |
| KBC46#88 (D1, D)  |          | 88 kras   | 2011-3-18    | Taxotere+AZD | 3         | 0.7     | -53%       | 0.23           | 0.019         |
| KBC46#88          |          | 88 kras   | 2011-4-5     | (Baseline)   | 20        | 2.7     | (Baseline) | 0.37           | 0.023         |
| KBC46#89 (D1, D)  |          | 89 kras   | 2011-3-15    | Taxotere     | 0         | 2.4     | (Baseline) | 0.23           | 0.028         |
| KBC46#89 (D1, D)  |          | 89 kras   | 2011-3-16    | Taxotere     | 1         | 3.4     | 42%        | 0.28           | 0.038         |
| KBC46#89 (D1, D)  |          | 89 kras   | 2011-3-18    | Taxotere     | 3         | 4.1     | 71%        | 0.34           | 0.024         |
| KR#1942 (D1, ...) |          | 1942 kras | 2011-5-10    | Taxotere     | 0         | 1.3     | (Baseline) | 0.6            | 0.04          |
| KR#1942 (D1, ...) |          | 1942 kras | 2011-5-11    | Taxotere     | 1         | 1.5     | 15%        | 0.64           | 0.025         |
| KR#1942           |          | 1942 kras | 2011-5-24    | Taxotere     | 14        | 1.7     | 31%        | 0.49           | 0.027         |
| #1945 (D1,D3, D7) |          | 1945 kras | 2011-5-17    | AZD          | 0         | 1.9     | (Baseline) | 0.3            | 0.019         |
| #1945 (D1,D3, D7) |          | 1945 kras | 2011-5-18    | AZD          | 1         | 1.2     | -37%       | 0.42           | 0.025         |
| #1945 (D1,D3, D7) |          | 1945 kras | 2011-5-20    | AZD          | 3         | 1.2     | -37%       | 0.38           | 0.032         |
| #1945 (D1,D3, D7) |          | 1945 kras | 2011-5-24    | AZD          | 7         | 0.9     | -53%       | 0.29           | 0.02          |
| #1946 (neg)       |          | 1946 kras | 2011-5-10    | (Baseline)   | 0         |         | (Baseline) |                |               |
| #1946 (neg)       |          | 1946 kras | 2011-5-18    | (Baseline)   | 0         |         | (Baseline) |                |               |
| #1951 (D1,D3, D7) |          | 1951 kras | 2011-5-17    | Taxotere     | 0         | 0.76    | (Baseline) | 0.29           | 0.018         |
| #1951 (D1,D3, D7) |          | 1951 kras | 2011-5-18    | Taxotere     | 1         | 0.79    | 0%         | 0.44           | 0.032         |
| #1951 (D1,D3, D7) |          | 1951 kras | 2011-5-20    | Taxotere     | 3         | 0.7     | 0%         | 0.42           | 0.032         |
| #1951 (D1,D3, D7) |          | 1951 kras | 2011-5-24    | Taxotere     | 7         | 0.58    | 0%         | 0.29           | 0.022         |
| KR#1952 (D1)      |          | 1952 kras | 2011-5-10    | AZD          | 0         | 0.9     | (Baseline) | 0.46           | 0.025         |
| KR#1952 (D1)      |          | 1952 kras | 2011-5-11    | AZD          | 1         | 0.6     | -33%       | 0.5            | 0.03          |
| #1953 (neg)       |          | 1953 kras | 2011-5-17    | (Baseline)   | 0         |         | (Baseline) |                |               |
| KR#1956 (D1,D3,   |          | 1956 kras | 2011-4-26    | Taxotere     | 0         | 1.3     | (Baseline) | 0.45           | 0.011         |
| KR#1956 (D1,D3,   |          | 1956 kras | 2011-4-27    | Taxotere     | 1         | 1.7     | 31%        | 0.4            | 0.033         |
| KR#1956 (D1,D3,   |          | 1956 kras | 2011-4-29    | Taxotere     | 3         | 1.4     | 8%         | 0.32           | 0.02          |
| KR#1956 (D1,D3,   |          | 1956 kras | 2011-5-3     | Taxotere     | 6         | 2.1     | 62%        | 0.45           | 0.05          |
| #1957 (neg)       |          | 1957 kras | 2011-5-2     | (Baseline)   | 0         | 0.65    | (Baseline) | 0.32           | 0.023         |
| #1957             |          | 1957 kras | 2011-5-3     | (Baseline)   | 0         | 0.79    | (Baseline) | 0.51           | 0.036         |
| #1957(D1,D3)      |          | 1957 kras | 2011-5-24    | AZD          | 0         | 1.1     | (Baseline) | 0.54           | 0.023         |
| #1957(D1,D3)      |          | 1957 kras | 2011-5-25    | AZD          | 1         | 0.44    | -60%       | 0.33           | 0.026         |
| #1957(D1,D3)      |          | 1957 kras | 2011-5-27    | AZD          | 3         | 0.45    | -59%       | 0.29           | 0.018         |
| #1959 (neg)       |          | 1959 kras | 2011-5-2     | (Baseline)   | 0         |         | (Baseline) |                |               |
| #1959             |          | 1959 kras | 2011-5-3     | (Baseline)   | 0         |         | (Baseline) |                |               |
| KR59              |          | 1960 kras | 2011-4-26    | Taxotere+AZD | 0         | 1.9     | (Baseline) | 0.376          | 0.022         |
| KR59              |          | 1960 kras | 2011-4-27    | Taxotere+AZD | 1         | 0.8     | -58%       | 0.5            | 0.04          |
| KR59              |          | 1960 kras | 2011-4-29    | Taxotere+AZD | 3         | 0.7     | -63%       | 0.45           | 0.022         |
| KR#1975 (D1,D3,   |          | 1975 kras | 2011-4-26    | Taxotere     | 0         | 1.2     | (Baseline) | 0.47           | 0.019         |
| KR#1975 (D1,D3,   |          | 1975 kras | 2011-4-27    | Taxotere     | 1         | 1.6     | 33%        | 0.38           | 0.025         |
| KR#1975 (D1,D3,   |          | 1975 kras | 2011-4-29    | Taxotere     | 3         | 1.8     | 50%        | 0.35           | 0.04          |
| KR#1975 (D1,D3,   |          | 1975 kras | 2011-5-3     | Taxotere     | 7         | 1.7     | 42%        | 0.35           | 0.026         |

|                    |           |           |              |    |      |            |       |        |
|--------------------|-----------|-----------|--------------|----|------|------------|-------|--------|
| KR#1975 (D1,D3,    | 1975 kras | 2011-5-13 | Taxotere     | 17 | 1.5  | 25%        | 0.3   | 0.034  |
| KN1150#3203 (D·    | 3203 p53  | 2011-4-18 | Taxotere     | 0  | 2.3  | (Baseline) | 0.52  | 0.032  |
| KN1150#3203 (D·    | 3203 p53  | 2011-4-19 | Taxotere     | 1  | 2.6  | 13%        | 0.55  | 0.026  |
| KN1150#3203 (D·    | 3203 p53  | 2011-4-21 | Taxotere     | 3  | 2.6  | 13%        | 0.53  | 0.027  |
| KN1150#3203 (D·    | 3203 p53  | 2011-5-12 | AZD          | 0  | 5.1  | (Baseline) | 0.65  | 0.058  |
| KN1150#3203 (D·    | 3203 p53  | 2011-5-13 | AZD          | 1  | 3.2  | -37%       | 0.64  | 0.05   |
| KN1150#3211 (D·    | 3211 p53  | 2011-4-18 | Taxotere     | 0  | 0.78 | (Baseline) | 0.33  | 0.0316 |
| KN1150#3211 (D·    | 3211 p53  | 2011-4-19 | Taxotere     | 1  | 1    | 28%        | 0.496 | 0.029  |
| KN1150#3211 (D·    | 3211 p53  | 2011-4-21 | Taxotere     | 3  | 0.93 | 19%        | 0.43  | 0.037  |
| KN1146#3284        | 3284 p53  | 2011-4-18 | Taxotere+AZD | 0  | 6    | (Baseline) | 0.6   | 0.038  |
| KN1146#3284 (D·    | 3284 p53  | 2011-4-19 | Taxotere+AZD | 1  | 3    | -50%       | 0.43  | 0.037  |
| KN1146#3284 (D·    | 3284 p53  | 2011-4-21 | Taxotere+AZD | 3  | 2.3  | -62%       | 0.36  | 0.046  |
| KN1146#3284 (D·    | 3284 p53  | 2011-5-12 | BKM+AZD      | 0  | 2.8  | (Baseline) | 0.46  | 0.04   |
| KN1146#3284 (D·    | 3284 p53  | 2011-5-13 | BKM+AZD      | 1  | 1.1  | -61%       | 0.23  | 0.028  |
| KN1150#3286 (D·    | 3286 p53  | 2011-4-18 | AZD          | 0  | 0.5  | (Baseline) | 0.21  | 0.014  |
| KN1150#3286 (D·    | 3286 p53  | 2011-4-19 | AZD          | 1  | 0.6  | 0%         | 0.053 | 0.023  |
| KN1150#3286 (D·    | 3286 p53  | 2011-4-21 | AZD          | 3  | 0.4  | 0%         | 0.39  | 0.019  |
| KN1146#3305 (D·    | 3305 p53  | 2011-4-18 | Taxotere+AZD | 0  | 1.8  | (Baseline) | 0.31  | 0.019  |
| KN1146#3305 (D·    | 3305 p53  | 2011-4-19 | Taxotere+AZD | 1  | 1    | -44%       | 0.4   | 0.02   |
| KN1146#3305 (D·    | 3305 p53  | 2011-4-21 | Taxotere+AZD | 3  | 0.87 | -52%       | 0.43  | 0.0255 |
| #3313 (D1, D3)     | 3313 p53  | 2011-5-19 | AZD          | 0  | 0.92 | (Baseline) | 0.35  | 0.026  |
| #3313 (D1, D3)     | 3313 p53  | 2011-5-20 | AZD          | 1  | 1    | 0%         | 0.556 | 0.031  |
| #3313 (D1, D3)     | 3313 p53  | 2011-5-23 | AZD          | 3  | 1    | 0%         | 0.33  | 0.028  |
| #3314 (neg)        | 3314 p53  | 2011-5-19 | (Baseline)   | 0  |      | (Baseline) |       |        |
| #3318 (D1, D2)     | 3318 p53  | 2011-5-25 | AZD          | 0  | 1.8  | (Baseline) | 0.34  | 0.046  |
| #3318 (D1, D2)     | 3318 p53  | 2011-5-26 | AZD          | 1  | 1.5  | -17%       | 0.32  | 0.026  |
| #3318 (D1, D2)     | 3318 p53  | 2011-5-27 | AZD          | 2  | 1.6  | -11%       | 0.38  | 0.023  |
| #3318 (D1, D2)     | 3318 p53  | 2011-5-31 | AZD          | 6  | 2    | 11%        | 0.34  | 0.03   |
| #3318 (D1, D2)     | 3318 p53  | 2011-5-31 | AZD          | 6  | 2.1  | 17%        | 0.49  | 0.02   |
| #3320 (D1, D2)     | 3320 p53  | 2011-5-25 | AZD          | 0  | 1    | (Baseline) | 0.2   | 0.022  |
| #3320 (D1, D2)     | 3320 p53  | 2011-5-26 | AZD          | 1  | 0.3  | -70%       | 0.13  | 0.014  |
| #3320 (D1, D2)     | 3320 p53  | 2011-5-27 | AZD          | 2  | 0.74 | -26%       | 0.35  | 0.025  |
| #3320 (D6)         | 3320 p53  | 2011-5-31 | AZD          | 6  | 0.9  | -10%       | 0.26  | 0.0186 |
| #3321 (neg)        | 3321 p53  | 2011-5-19 | (Baseline)   | 0  |      | (Baseline) |       |        |
| #3323 (D1, D4)     | 3323 p53  | 2011-5-19 | Taxotere     | 0  | 0.94 | (Baseline) | 0.39  | 0.023  |
| #3323 (D1, D4)     | 3323 p53  | 2011-5-20 | Taxotere     | 1  | 1    | 6%         | 0.457 | 0.0286 |
| #3323 (D1, D4)     | 3323 p53  | 2011-5-23 | Taxotere     | 4  | 0.52 | -45%       | 0.29  | 0.016  |
| KN1152             | 3326 p53  | 2011-5-31 | AZD          | 0  | 1.4  | (Baseline) | 0.485 | 0.028  |
| KN1152             | 3326 p53  | 2011-6-1  | AZD          | 1  | 1    | -29%       | 0.45  | 0.0186 |
| KN1152             | 3326 p53  | 2011-6-3  | AZD          | 3  | 0.88 | -37%       | 0.46  | 0.026  |
| KN1152             | 3328 p53  | 2011-5-31 | Taxotere+AZD | 0  | 3.9  | (Baseline) | 0.493 | 0.021  |
| KN1152             | 3328 p53  | 2011-6-1  | Taxotere+AZD | 1  | 2.1  | -46%       | 0.4   | 0.018  |
| KN1152             | 3328 p53  | 2011-6-3  | Taxotere+AZD | 3  | 4.3  | 10%        | 0.42  | 0.04   |
| #3329              | 3329 p53  | 2011-5-10 | (Baseline)   | 0  | 0.73 | (Baseline) | 0.4   | 0.023  |
| KN1152             | 3329 p53  | 2011-5-31 | Taxotere     | 0  | 1.7  | (Baseline) | 0.4   | 0.018  |
| KN1152             | 3329 p53  | 2011-6-1  | Taxotere     | 1  | 1.9  | 12%        | 0.32  | 0.018  |
| KLM#6358           | 6358 kras | 2011-5-2  | (Baseline)   | 0  |      | (Baseline) |       |        |
| KN1152             | 3328 p53  | 2011-6-7  | Taxotere+AZD | 7  | 4.4  | 13%        | 0.36  | 0.014  |
| KLM#6359 (D1,D·    | 6359 kras | 2011-5-2  | Taxotere+AZD | 0  | 1.6  | (Baseline) | 0.46  | 0.021  |
| KLM#6359 (D1,D·    | 6359 kras | 2011-5-3  | Taxotere+AZD | 1  | 1.2  | -25%       | 0.62  | 0.03   |
| KLM#6359 (D1,D·    | 6359 kras | 2011-5-18 | AZD          | 0  | 1.4  | (Baseline) | 0.34  | 0.03   |
| KLM#6359 (D1,D·    | 6359 kras | 2011-5-19 | AZD          | 1  | 1.3  | -7%        | 0.42  | 0.023  |
| KLM#6359 (D1,D·    | 6359 kras | 2011-5-5  | Taxotere+AZD | 3  | 1    | -29%       | 0.55  | 0.028  |
| KLM#6359 (D1,D·    | 6359 kras | 2011-5-23 | Taxotere+AZD | 0  | 1.8  | (Baseline) | 0.49  | 0.038  |
| #6368 (neg)        | 6368 kras | 2011-4-26 | (Baseline)   | 0  | 0.6  | (Baseline) | 0.27  | 0.204  |
| #6368 (D1,D3)      | 6368 kras | 2011-5-24 | AZD          | 0  | 1.1  | (Baseline) | 0.44  | 0.034  |
| #6368 (D1,D3)      | 6368 kras | 2011-5-25 | AZD          | 1  | 1    | -9%        | 0.39  | 0.027  |
| #6368 (D1,D3)      | 6368 kras | 2011-5-27 | AZD          | 3  | 1.1  | 0%         | 0.46  | 0.014  |
| KLM#6369 (D1,D·    | 6369 kras | 2011-4-26 | Taxotere     | 0  | 0.76 | (Baseline) | 0.4   | 0.018  |
| KLM#6369 (D1,D·    | 6369 kras | 2011-4-27 | Taxotere     | 1  | 1.2  | 0%         | 0.49  | 0.026  |
| KLM#6369 (D1,D·    | 6369 kras | 2011-4-29 | Taxotere     | 3  | 1.2  | 0%         | 0.48  | 0.034  |
| KLM#6369 (D1,D·    | 6369 kras | 2011-5-3  | Taxotere     | 7  | 1.4  | 0%         | 0.54  | 0.028  |
| KLM#6369 (D1,D·    | 6369 kras | 2011-5-13 | Taxotere     | 17 | 1.2  | 0%         | 0.58  | 0.021  |
| #6529 (neg)        | 6529 lkb  | 2011-5-17 | (Baseline)   | 0  | 0.54 | (Baseline) | 0.3   | 0.02   |
| #6531 (D1, D2, ... | 6531 lkb  | 2011-5-25 | AZD          | 0  | 0.98 | (Baseline) | 0.18  | 0.023  |
| #6531 (D1, D2, ... | 6531 lkb  | 2011-5-26 | AZD          | 1  | 1    | 0          | 0.23  | 0.023  |
| #6531 (D1, D2, ... | 6531 lkb  | 2011-5-27 | AZD          | 2  | 0.7  | ?          | 0.15  | 0.014  |
| #6532 (D1, D3, ... | 6532 lkb  | 2011-5-17 | AZD          | 0  | 1.5  | (Baseline) | 0.61  | 0.026  |
| #6532 (D1, D3, ... | 6532 lkb  | 2011-5-18 | AZD          | 1  | 1    | -33%       | 0.65  | 0.04   |

|                    |           |           |              |   |     |            |      |       |
|--------------------|-----------|-----------|--------------|---|-----|------------|------|-------|
| #6532 (D1, D3, ... | 6532 lkb  | 2011-5-20 | AZD          | 3 | 1.2 | -20%       | 0.72 | 0.04  |
| KLM#6359 (D1,D:    | 6359 kras | 2011-5-24 | Taxotere+AZD | 1 | 0.6 | -50%       | 0.39 | 0.026 |
| #6533              | 6533 lkb  | 2011-5-17 | Taxotere+AZD | 0 | 1.5 | (Baseline) | 0.39 | 0.026 |
| #6535 (D1, D2, ... | 6535 lkb  | 2011-5-25 | AZD          | 0 | 2.9 | (Baseline) | 0.2  | 0.025 |
| #6535 (D1, D2, ... | 6535 lkb  | 2011-5-26 | AZD          | 1 | 1.5 | -48%       | 0.22 | 0.019 |
| #6535 (D1, D2, ... | 6535 lkb  | 2011-5-27 | AZD          | 2 | 1.4 | -52%       | 0.23 | 0.016 |
| KN1152             | 3326 p53  | 2011-6-7  | AZD          | 7 | 1   | -29%       | 0.47 | 0.019 |
| #6533              | 6533 lkb  | 2011-5-18 | Taxotere+AZD | 1 | 1.2 | -20%       | 0.65 | 0.04  |

**Supplementary Table 6. Mice used in pharmacodynamic studies**

| Mouse         | Genotype  | Treatment | Sex | DOB        | Adeno-Cre  | Age at Adeno-Cre(weeks) | Treatment Start Date | Induction Length at treatment start(weeks) | Pathology                                                    |
|---------------|-----------|-----------|-----|------------|------------|-------------------------|----------------------|--------------------------------------------|--------------------------------------------------------------|
| <b>MKL512</b> | Kras/Lkb1 | WT        | M   | 2005-8-19  | 2005-10-28 | 10.0                    | N/D                  | N/D                                        | Adenocarcinoma, poor differentiation with squamous component |
| <b>MKL515</b> | Kras/Lkb1 | WT        | M   | 2005-8-19  | 2005-10-28 | 10.0                    | N/D                  | N/D                                        | Mixed adeno/squamous carcinoma                               |
| <b>KL6348</b> | Kras/Lkb1 | WT        | M   | 2010-10-22 | 2010-11-30 | 5.6                     | 2011-1-19            | 7.1                                        | Mixed adeno/squamous carcinoma                               |
| <b>KL6350</b> | Kras/Lkb1 | D         | M   | 2010-10-22 | 2010-11-30 | 5.6                     | 2011-1-19            | 7.1                                        | Adenocarcinoma, poor differentiation with squamous component |
| <b>KL6053</b> | Kras/Lkb1 | D         | F   | 2010-5-3   | 2010-6-24  | 7.4                     | 2010-8-21            | 8.3                                        | Mixed adeno/squamous carcinoma                               |
| <b>KL6047</b> | Kras/Lkb1 | DS        | F   | 2010-5-3   | 2010-6-24  | 7.4                     | 2010-8-21            | 8.3                                        | Adenocarcinoma, poor differentiation with squamous component |
| <b>KR6193</b> | Kras      | WT        | M   | 2010-6-19  | 2010-8-3   | 6.4                     | 2010-12-2            | 17.3                                       | Adenocarcinoma                                               |
| <b>KR15</b>   | Kras      | DS        | M   | 2010-6-28  | 2010-8-11  | 6.3                     | 2010-12-2            | 16.1                                       | Adenocarcinoma                                               |
| <b>KR09</b>   | Kras      | DS        | M   | 2010-6-28  | 2010-8-11  | 6.3                     | 2010-12-2            | 16.1                                       | Adenocarcinoma                                               |
| <b>KR10</b>   | Kras      | D         | F   | 2010-6-28  | 2010-8-11  | 6.3                     | 2010-12-2            | 16.1                                       | Adenocarcinoma                                               |
| <b>KR12</b>   | Kras      | D         | M   | 2010-6-28  | 2010-8-11  | 6.3                     | 2010-12-2            | 16.1                                       | Adenocarcinoma                                               |
| <b>KN2182</b> | Kras/p53  | WT        | M   | 2009-3-29  | 2009-5-14  | 6.6                     | 2009-8-10            | 12.6                                       | Adenocarcinoma , poor differentiation                        |
| <b>KN2261</b> | Kras/p53  | WT        | M   | 2009-5-10  | 2009-6-24  | 6.4                     | 2009-9-1             | 9.9                                        | Adenocarcinoma , poor differentiation                        |
| <b>KN2256</b> | Kras/p53  | D         | M   | 2009-5-10  | 2009-6-24  | 6.4                     | 2009-9-1             | 9.9                                        | Adenocarcinoma , poor differentiation                        |
| <b>KN2259</b> | Kras/p53  | D         | M   | 2009-5-10  | 2009-6-24  | 6.4                     | 2009-9-1             | 9.9                                        | Adenocarcinoma , poor differentiation                        |
| <b>KN2247</b> | Kras/p53  | DS        | M   | 2009-5-10  | 2009-6-24  | 6.4                     | 2009-9-1             | 9.9                                        | Adenocarcinoma , poor differentiation                        |
| <b>KN2567</b> | Kras/p53  | DS        | F   | 2009-9-15  | 2009-11-5  | 7.3                     | 2010-1-7             | 9.0                                        | Adenocarcinoma , poor differentiation                        |



**Supplementary Table 7. DFCI Patient Information**

|   | Sex | Race  | Smoking History, pack-years | Histology       | Biopsy Site | Status of biosied lesion at time of Bx | KRAS mutati on Status | LKB1 Staining | PET SUVmax |
|---|-----|-------|-----------------------------|-----------------|-------------|----------------------------------------|-----------------------|---------------|------------|
| 1 | F   | White | 15                          | NSCLC NOS       | Lung        | Untreated, growing                     | G12V                  | Negative      | 8.83       |
| 2 | F   | White | 24                          | Adenocarcinom a | Lung        | On chemo, responding                   | G12A                  | Negative      | 7.51       |
| 3 | M   | White | 40                          | Adenosquamou s  | Lung        | Untreated, growing                     | G12D                  | Negative      | 4.6        |
| 4 | M   | White | 71                          | Adenocarcinom a | LN          | Untreated, growing                     | G12A                  | Negative      | 18.7       |
| 5 | F   | White | 35                          | NSCLC NOS       | LN          | Untreated, growing                     | G12C                  | Negative      | 6.49       |
| 6 | F   | White | 3                           | Adenocarcinom a | Lung        | Untreated, growing                     | G12D                  | Negative      | 6.34       |
| 7 | F   | White | 74                          | Adenocarcinom a | Lung        | Untreated, growing                     | G12V                  | Positive      | 0.38       |
| 8 | F   | Asian | 0                           | Adenocarcinom a | Lung        | Untreated, growing                     | G12V                  | Positive      | 0.41       |
| 9 | F   | White | 30                          | Adenocarcinom a | Liver       | On chemo, growing                      | G12C                  | Positive      | 6.2        |

Supplementary Table 8. UNC Patients Information

| KWong_pERK_Project_Identifier | LKB1 Status | KRAS Status | TP53 Status | AgeatDiagnosis | Race  | Sex    | CancerType                 | TumorHistology          | Grade                     | SourceCancer | FinalStage |
|-------------------------------|-------------|-------------|-------------|----------------|-------|--------|----------------------------|-------------------------|---------------------------|--------------|------------|
| KW_pERK_01                    | mutation    | mutation    | no mutation | 53.78          | White | Female | Non-small cell lung cancer | Adenocarcinoma          | Moderately differentiated | Primary      | IA         |
| KW_pERK_02                    | mutation    | mutation    | no mutation | 81.75          | White | Male   | Non-small cell lung cancer | Adenocarcinoma          | Moderately differentiated | Primary      | IB         |
| KW_pERK_03                    | mutation    | no mutation | mutation    | 79.81          | White | Male   | Non-small cell lung cancer | Squamous Cell Carcinoma | Moderately differentiated | Primary      | IIB        |
| KW_pERK_04                    | mutation    | no mutation | no mutation | 63.75          | White | Male   | Non-small cell lung cancer | Adenosquamous Carcinoma | Moderately differentiated | Primary      | IA         |
| KW_pERK_05                    | no mutation | mutation    | mutation    | 67.19          | White | Male   | Non-small cell lung cancer | Large Cell Carcinoma    | Poorly differentiated     | Primary      | IA         |
| KW_pERK_06                    | no mutation | mutation    | mutation    | 57.27          | White | Female | Non-small cell lung cancer | Adenocarcinoma          | Poorly differentiated     | Primary      | IB         |
| KW_pERK_07                    | no mutation | mutation    | mutation    | 74.42          | White | Male   | Non-small cell lung cancer | Adenocarcinoma          | Moderately differentiated | Primary      | IB         |
| KW_pERK_08                    | no mutation | mutation    | no mutation | 63.59          | White | Male   | Non-small cell lung cancer | Adenocarcinoma          | Moderately differentiated | Primary      | IIA        |
| KW_pERK_09                    | no mutation | mutation    | no mutation | 41.93          | White | Female | Non-small cell lung cancer | Adenosquamous Carcinoma | Not evaluated             | Primary      | IB         |
| KW_pERK_10                    | no mutation | no mutation | no mutation | 73.36          | White | Male   | Non-small cell lung cancer | Squamous Cell Carcinoma | Moderately differentiated | Primary      | IB         |
| KW_pERK_11                    | no mutation | no mutation | mutation    | 73.94          | White | Male   | Non-small cell lung cancer | Adenosquamous Carcinoma | Moderately differentiated | Primary      | IB         |
| KW_pERK_12                    | no mutation | no mutation | mutation    | 41.05          | Black | Female | Non-small cell lung cancer | Squamous Cell Carcinoma | Poorly differentiated     | Primary      | IB         |
| KW_pERK_13                    | no mutation | no mutation | mutation    | 63.05          | White | Male   | Non-small cell lung cancer | Squamous Cell Carcinoma | Moderately differentiated | Primary      | IIB        |
| KW_pERK_14                    | no mutation | no mutation | mutation    | 81.16          | White | Female | Non-small cell lung cancer | Squamous Cell Carcinoma | Poorly differentiated     | Primary      | IB         |
| KW_pERK_15                    | no mutation | no mutation | mutation    | 48.46          | White | Male   | Non-small cell lung cancer | Squamous Cell Carcinoma | Moderately differentiated | Primary      | IIB        |
| KW_pERK_16                    | no mutation | no mutation | mutation    | 74.74          | White | Female | Non-small cell lung cancer | Squamous Cell Carcinoma | Moderately differentiated | Primary      | IB         |
| KW_pERK_17                    | no mutation | no mutation | mutation    | 64.52          | White | Male   | Non-small cell lung cancer | Adenosquamous Carcinoma | Poorly differentiated     | Primary      | IIB        |
| KW_pERK_18                    | no mutation | no mutation | mutation    | 79.82          | White | Male   | Non-small cell lung cancer | Large Cell Carcinoma    | Poorly differentiated     | Primary      | IIB        |
| KW_pERK_19                    | no mutation | no mutation | mutation    | 55.49          | Black | Male   | Non-small cell lung cancer | Large Cell Carcinoma    | Poorly differentiated     | Primary      | IB         |
| KW_pERK_20                    | no mutation | no mutation | mutation    | 64.11          | White | Female | Non-small cell lung cancer | Adenocarcinoma          | Poorly differentiated     | Primary      | IA         |
| KW_pERK_21                    | no mutation | no mutation | mutation    | 75.80          | White | Female | Non-small cell lung cancer | Adenocarcinoma          | Poorly differentiated     | Primary      | IB         |
| KW_pERK_22                    | no mutation | no mutation | mutation    | 72.67          | White | Female | Non-small cell lung cancer | Squamous Cell Carcinoma | Moderately differentiated | Primary      | IA         |
| KW_pERK_23                    | no mutation | no mutation | mutation    | 64.89          | White | Male   | Non-small cell lung cancer | Squamous Cell Carcinoma | Poorly differentiated     | Primary      | IB         |
| KW_pERK_24                    | no mutation | no mutation | mutation    | 69.52          | White | Male   | Non-small cell lung cancer | Adenosquamous Carcinoma | Poorly differentiated     | Primary      | IA         |
| KW_pERK_25                    | no mutation | no mutation | no mutation | 41.29          | White | Female | Non-small cell lung cancer | Adenocarcinoma          | Moderately differentiated | Primary      | IIB        |
| KW_pERK_26                    | no mutation | no mutation | no mutation | 63.11          | Black | Male   | Non-small cell lung cancer | Adenocarcinoma          | Moderately differentiated | Primary      | IIIA       |
| KW_pERK_27                    | no mutation | no mutation | no mutation | 61.27          | White | Female | Non-small cell lung cancer | Large Cell Carcinoma    | Poorly differentiated     | Primary      | IIB        |
| KW_pERK_28                    | no mutation | no mutation | no mutation | 72.99          | White | Male   | Non-small cell lung cancer | Squamous Cell Carcinoma | Moderately differentiated | Primary      | IB         |
| KW_pERK_29                    | no mutation | no mutation | no mutation | 83.13          | White | Female | Non-small cell lung cancer | Squamous Cell Carcinoma | Poorly differentiated     | Primary      | IIB        |
| KW_pERK_30                    | no mutation | no mutation | no mutation | 59.45          | White | Male   | Non-small cell lung cancer | Squamous Cell Carcinoma | Poorly differentiated     | Primary      | IIB        |
| KW_pERK_31                    | no mutation | no mutation | no mutation | 66.78          | White | Female | Non-small cell lung cancer | Adenocarcinoma          | Poorly differentiated     | Primary      | IA         |
| KW_pERK_32                    | no mutation | no mutation | no mutation | 61.87          | White | Male   | Non-small cell lung cancer | Squamous Cell Carcinoma | Poorly differentiated     | Primary      | IIB        |
| KW_pERK_33                    | no mutation | no mutation | no mutation | 81.04          | White | Male   | Non-small cell lung cancer | Squamous Cell Carcinoma | Moderately differentiated | Primary      | IIB        |
| KW_pERK_34                    | no mutation | no mutation | no mutation | 76.98          | White | Male   | Non-small cell lung cancer | Adenocarcinoma          | Poorly differentiated     | Primary      | IIIA       |
| KW_pERK_35                    | no mutation | no mutation | no mutation | 52.15          | White | Female | Non-small cell lung cancer | Adenocarcinoma          | Moderately differentiated | Primary      | IA         |
| KW_pERK_36                    | no mutation | no mutation | no mutation | 67.66          | Asian | Male   | Non-small cell lung cancer | Squamous Cell Carcinoma | Moderately differentiated | Primary      | IB         |
| KW_pERK_37                    | no mutation | no mutation | no mutation | 75.26          | White | Female | Non-small cell lung cancer | Adenocarcinoma          | Moderately differentiated | Primary      | IA         |
| KW_pERK_38                    | no mutation | no mutation | no mutation | 54.98          | Black | Male   | Non-small cell lung cancer | Large Cell Carcinoma    | Poorly differentiated     | Primary      | IIB        |
| KW_pERK_39                    | no mutation | no mutation | no mutation | 66.41          | White | Female | Non-small cell lung cancer | Adenocarcinoma          | Poorly differentiated     | Primary      | IB         |
| KW_pERK_40                    | no mutation | no mutation | no mutation | 65.12          | White | Male   | Non-small cell lung cancer | Adenosquamous Carcinoma | Poorly differentiated     | Primary      | IA         |
| KW_pERK_41                    | no mutation | no mutation | no mutation | 73.50          | White | Female | Non-small cell lung cancer | Adenocarcinoma          | Moderately differentiated | Primary      | IIIA       |
| KW_pERK_42                    | no mutation | no mutation | no mutation | 68.17          | White | Male   | Non-small cell lung cancer | Squamous Cell Carcinoma | Moderately differentiated | Primary      | IIIA       |
| KW_pERK_43                    | no mutation | no mutation | no mutation | 49.41          | White | Male   | Non-small cell lung cancer | Adenocarcinoma          | Moderately differentiated | Primary      | IB         |
| KW_pERK_44                    | no mutation | no mutation | no mutation | 64.23          | White | Male   | Non-small cell lung cancer | Adenosquamous Carcinoma | Moderately differentiated | Primary      | IB         |
| KW_pERK_45                    | no mutation | no mutation | no mutation | 86.33          | White | Female | Non-small cell lung cancer | Large Cell Carcinoma    | Poorly differentiated     | Primary      | IV         |
| KW_pERK_46                    | no mutation | no mutation | no mutation | 75.57          | White | Male   | Non-small cell lung cancer | Squamous Cell Carcinoma | Poorly differentiated     | Primary      | IB         |
| KW_pERK_47                    | no mutation | no mutation | no mutation | 60.96          | White | Female | Non-small cell lung cancer | Adenocarcinoma          | Moderately differentiated | Primary      | IB         |
| KW_pERK_48                    | no mutation | no mutation | no mutation | 77.72          | White | Female | Non-small cell lung cancer | Squamous Cell Carcinoma | Moderately differentiated | Primary      | IA         |
| KW_pERK_49                    | no mutation | no mutation | no mutation | 66.68          | White | Male   | Non-small cell lung cancer | Adenocarcinoma          | Poorly differentiated     | Primary      | IIIA       |
| KW_pERK_50                    | no mutation | no mutation | no mutation | 70.62          | Black | Male   | Non-small cell lung cancer | Squamous Cell Carcinoma | Moderately differentiated | Primary      | IB         |
| KW_pERK_51                    | no mutation | no mutation | no mutation | 47.05          | Asian | Female | Non-small cell lung cancer | Adenocarcinoma          | Moderately differentiated | Primary      | IB         |
| KW_pERK_52                    | no mutation | no mutation | no mutation | 59.53          | White | Female | Non-small cell lung cancer | Adenosquamous Carcinoma | Poorly differentiated     | Primary      | IIIA       |
| KW_pERK_53                    | no mutation | no mutation | no mutation | 48.79          | Black | Male   | Non-small cell lung cancer | Large Cell Carcinoma    | Poorly differentiated     | Primary      | IIB        |
| KW_pERK_54                    | no mutation | no mutation | no mutation | 49.02          | Black | Male   | Non-small cell lung cancer | Adenocarcinoma          | Moderately differentiated | Primary      | IV         |
| KW_pERK_55                    | no mutation | no mutation | no mutation | 57.59          | White | Male   | Non-small cell lung cancer | Adenocarcinoma          | Poorly differentiated     | Primary      | IA         |
| KW_pERK_56                    | no mutation | no mutation | no mutation | 78.36          | White | Female | Non-small cell lung cancer | Adenocarcinoma          | Moderately differentiated | Primary      | IB         |
| KW_pERK_57                    | no mutation | no mutation | no mutation | 58.17          | White | Female | Non-small cell lung cancer | Squamous Cell Carcinoma | Moderately differentiated | Primary      | IB         |

## Methods

**Mice:** Mouse strains harboring conditional activating mutation (G12D) at the endogenous *Kras* locus, conditional *Lkb1* knockout, and conditional *p53* knockout were activated by nasal instillation of  $5 \times 10^6$  pfu of adenovirus encoded CRE recombinase administered between 6-8 weeks of age under isoflurane anesthesia. Virus was diluted in alpha-MEM and activated by calcium chloride. *Kras* only mice had a latency of 13-15 weeks after induction. *Kras/p53* and *Kras/Lkb1* mice had a latency of 8-10 weeks and 6-7 weeks respectively.

**MRI quantification:** Mouse lung cancer MRI scans were quantified by 3D Slicer software. Threshold intensity was obtained by calculating background intensity for each scan. Potential tumor bearing areas in the scans were selected manually. Potential tumors with higher intensity value than preset threshold intensity were segmented by the software automatically. Reconstruction and calculation of total tumor volume was performed using 3D Slicer.

**Therapeutics:** Docetaxel was diluted in PBS and administered by IP injection at 15ul/gram body weight. The dosing of the various therapeutics are described in the text. After the initial 2 weeks of treatment with 16mpk of docetaxel every other day, the dose was adjusted to 8 mpk every 3 days thereafter for chronic treatment studies. Selumetinib was resuspended in 0.5% methylcellulose with 0.1% Tween-80, and administered by oral gavage at 20ul/gram body weight.

### PET/CT:

For FDG-PET/CT studies, each mouse was fasted overnight (~ 12 to 16 hours) while allowing free access to water. Mice were warmed for at least one hours, then injected with ~ 14 MBq@250uL of  $^{18}\text{F}$ -FDG through intraperitoneal administration. Mice were subjected to an one-hour awake uptake period before being anesthetized by inhaling a mixture of sevoflurane and oxygen. Mice were scanned with a low-dose CT acquisition protocol (80 kVp, 0.5 mA, 220 degree rotation, 600 ms/degree exposure time, 80  $\mu\text{m}$  reconstruction pixel size), followed

by a PET data acquisition protocol (350-650 keV energy window, 10 minutes listmode acquisition, 3D rebinning followed by OSEM-MAP reconstruction) on a multi-modality preclinical imaging system (Inveon, Siemens Healthcare). Reconstructed PET/CT images were visualized and analyzed using Inveon Research Workplace (Siemens Healthcare), where lung tumors were identified and quantified by their standardized uptake values (SUVs). The percentage differences of SUV max for the same tumor between the baseline and post-treatment images were then calculated. For human PET/CT images, the maximum standard uptake value (SUVmax) of lung tumors was determined by a thoracic radiologist, who was blinded to the patients' tumor LKB1 or p53 status.

#### **Immunohistochemistry Staining:**

Immunohistochemical analyses were performed using standard protocols with the following antibodies: p-ERK, activated caspase-3 (Cell Signaling), and Ki-67 (Dako). Briefly, sections were deparaffinized using Xylene for 30 min and antigen retrieval was performed by boiling in 10 mM sodium citrate with 0.05% Tween-20 for 15 min, or by pressure cooking. Primary antibodies were incubated overnight at 4°C and secondary antibodies for 2 hr at room temperature. Signals were detected using the ABC kit for immunoperoxidase staining (Vector Laboratories). Scoring of the staining was done by our consulting pathologist, using the same parameters used for scoring human specimens.

#### **Pharmacokinetics:**

For short-term analysis, tumor bearing mice were treated with one dose of docetaxel on day one. Selumetinib was administered daily (2 doses total). Mice were sacrificed 3 hours after the second dose of selumetinib on day 2. For long-term analysis, the last dose of selumetinib was administered 3 hours before sacrifice. Collected tumor nodules, serum and lung tissues were snapped frozen. All samples were analyzed using an API 4000 Q-Trap<sup>TM</sup> mass spectrometer interfaced with an Agilent 1200 HPLC. Plasma proteins were removed by addition of 100 µl acetonitrile to 25 µl plasma. Tissue samples were mixed with 10-fold water (10 µl water per mg tissue) and sonicated with a probe tip sonicator to break up the tissue.

After sonication, 25  $\mu\text{l}$  of tissue solution was mixed with 100  $\mu\text{l}$  acetonitrile. Samples were allowed to agitate for approximately ten minutes and centrifuged through a Millipore Multiscreen Solvinter 0.45 micron low binding PTFE hydrophilic filter plate. Concentrations were determined using standard curves prepared in mouse plasma or mouse lung over a concentration of 2 – 2000 ng/ml. Samples outside the linear range of the curve were 20-fold diluted using blank mouse plasma or blank mouse lung homogenate and reanalyzed. Positive ion multiple reaction monitoring MS/MS methods using the peak area of the transition  $m/z$  457 $\rightarrow$ 395 (decluster potential=40, collision energy=24) for AZ624 and 808.4 $\rightarrow$ 527.4 (decluster potential=40, collision energy=24) for taxotere. Tissue concentrations were corrected for dilution and converted to ng analyte per mg tissue. Assuming a density of 1 mg tissue equals 1  $\mu\text{l}$  allowed the tissue levels to be expressed as  $\mu\text{M}$  for easy comparison to plasma values. LC settings are provided in the table below.

LC (Agilent 1200) conditions of AZ624 or Taxotere

| Compound                          | AZ624                                                                   | Taxotere |
|-----------------------------------|-------------------------------------------------------------------------|----------|
| Column                            | Thermo Betasil C18, 50x2.1 mm, 5u                                       |          |
| Mobile phase                      | A: Water with 0.1% Formic Acid<br>B: Acetonitrile with 0.1% Formic Acid |          |
| Flow rate(ml/min)                 | 0.375                                                                   |          |
| Temperature( $^{\circ}\text{C}$ ) | 25                                                                      |          |
| Injection volume( $\mu\text{l}$ ) | 10                                                                      |          |
| Elution time (min)                | 4.3                                                                     | 4.7      |

Gradient elution conditions:

| Time (min) | Mobile phase A (%) | Mobile phase B (%) |
|------------|--------------------|--------------------|
| 0          | 90                 | 10                 |
| 0.5        | 90                 | 10                 |
| 2.0        | 5                  | 95                 |
| 3.0        | 5                  | 95                 |
| 4.0        | 90                 | 10                 |
| 7.0        | 90                 | 10                 |

**Statistical Analysis:**

The statistical analyses of tumor volume changes in Kras, Kras/p53 and Kras/Lkb1 mice after 2 weeks of treatment were performed using the likelihood ratio method to determine significant interactions between treatment and genotype. Our null hypotheses assumed the treatment difference to be zero for mice in the different genotypes. Statistical tests used for other data are as indicated in the text and figure legends.

**Western Blotting:**

Snap frozen tumor samples were processed using 1 x Lamelli loading buffer with the presence of protease and phosphatase inhibitors. Pre-cast gradient SDS-PAGE gels (Invitrogen) were used and all antibodies were from Cell Signaling Technology Inc., except the GLUT1 antibody, which was from Abcam.
